# Supplementary material
Source: Springer Nature journal article supplement (https://www.springermedizin.de/resource/supplementary/12885_2008_1166_MOESM8_ESM.pdf/9471284)

**A – Spleen (week 1)**

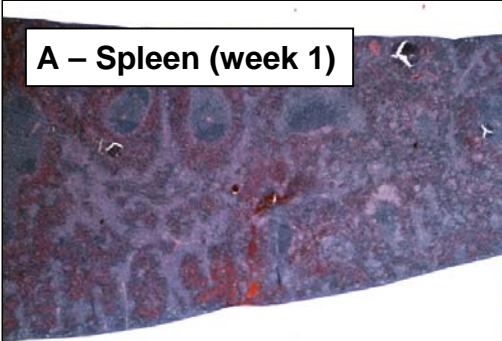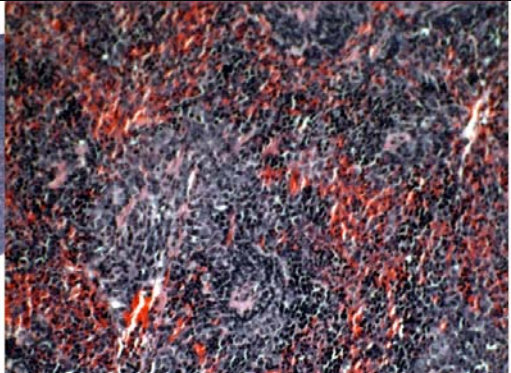

**B – Spleen (week 6)**

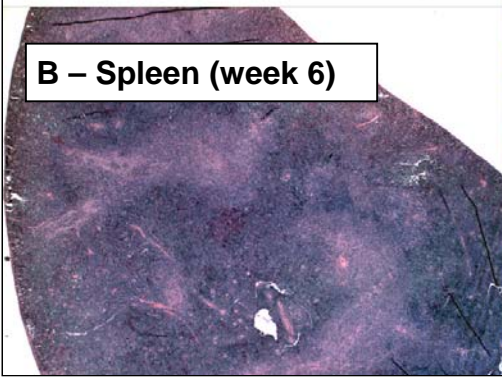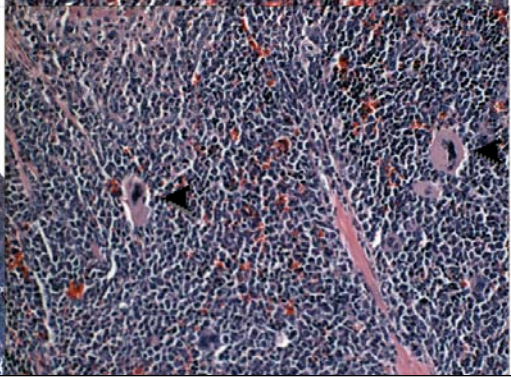

Supplement: MOESM8 [file 9471284]
